# Supplementary material for: In vitro study of cartilage tissue engineering using human adipose-derived stem cells induced by platelet-rich plasma and cultured on silk fibroin scaffold
Source: PubMed Central journal article supplement (PMC6894137; doi:10.1186/s13287-019-1443-2), 2019-12-04
Supplement: 13287_2019_1443_MOESM1_ESM.pdf [file 13287_2019_1443_MOESM1_ESM.pdf]

**Table S1 – Demographics of lipoaspirate donors**

| <b>Sample</b>       | <b>Age</b>       | <b>Sex</b> | <b>Anatomical Source (Fat Tissue)</b> | <b>Equipment</b>                                                                                          | <b>Time Between Harvest &amp; Processing</b> | <b>Cell SVF Number per 10 ml Fat Tissue (Cell)</b> | <b>Viability (%)</b> |
|---------------------|------------------|------------|---------------------------------------|-----------------------------------------------------------------------------------------------------------|----------------------------------------------|----------------------------------------------------|----------------------|
| Donor-1             | 49               | F          | Abdominal Subcutaneous                | Refrigerate Centrifuge 1 SL40R, Shaker Incubator Unimax1010<br>Hideolph, Light Microscope CX23<br>Olympus | Less than 1 hour                             | 81.000.000                                         | 97,61                |
| Donor-2             | 51               | F          | Abdominal Subcutaneous                |                                                                                                           | Less than 1 hour                             | 108.000.000                                        | 98,79                |
| Donor-3             | 41               | F          | Abdominal Subcutaneous                |                                                                                                           | Less than 1 hour                             | 45.000.000                                         | 99,19                |
| Donor-4             | 54               | M          | Abdominal Subcutaneous                |                                                                                                           | Less than 1 hour                             | 65.000.000                                         | 99,59                |
| <b>Average ± SD</b> | <b>49 ± 5.56</b> |            |                                       |                                                                                                           |                                              | <b>74,750,000 ± 26,612,967</b>                     | <b>98.80 ± 0.85</b>  |

**Table S2 – Minimum Information for Studies Evaluating Biologics in Orthopaedics (MIBO) checklist for mesenchymal stem cells research. The MIBO Checklist template followed by [55]**

| Section / Topic     | Item | Checklist item                                                                                                                                                                                                                  | Reported on Page No. |
|---------------------|------|---------------------------------------------------------------------------------------------------------------------------------------------------------------------------------------------------------------------------------|----------------------|
| Study Design        | 1    | Study conducted in accordance with CONSORT (RCT), STROBE (cohort, case-control or cross-sectional) or PRISMA (meta-analysis) guidelines                                                                                         | -                    |
|                     | 2    | Relevant institutional and ethical approval                                                                                                                                                                                     | 20                   |
| Recipient details   | 3    | Recipient demographics (including age, gender)                                                                                                                                                                                  | Table S1             |
|                     | 4    | Comorbidities (including underlying diabetes, inflammatory conditions, pre-existing joint pathology and smoking status)                                                                                                         | -                    |
|                     | 5    | Current anti-inflammatory medications                                                                                                                                                                                           | -                    |
| Injury details      | 6    | Diagnosis (including relevant grading system and chronicity)                                                                                                                                                                    | -                    |
|                     | 7    | Previous treatments for current injury                                                                                                                                                                                          | -                    |
| Intervention        | 8    | Surgical intervention described sufficiently to enable replication                                                                                                                                                              | -                    |
|                     | 9    | Operative findings                                                                                                                                                                                                              | -                    |
| Donors              | 10   | Donor age                                                                                                                                                                                                                       | Table S1             |
| Tissue harvest      | 11   | Tissue harvest described sufficiently to enable replication (including anatomical source, equipment, reagents, storage media and environment)                                                                                   | Table S1             |
|                     | 12   | Time between tissue harvest and processing                                                                                                                                                                                      | Table S1             |
| Processing          | 13   | Description of tissue processing that makes replication of the experiment possible (including digestion solution concentrations and volumes, duration, agitation and temperature of digestion phase, name of commercial system) | 3                    |
|                     | 14   | If performed, purification described sufficiently to enable replication (including combination and concentration antibodies, equipment, method of confirming purity)                                                            | -                    |
|                     | 15   | Yield with respect to volume of tissue processed                                                                                                                                                                                | Table S1             |
| Cell Culture        | 16   | If performed, cell culture described sufficiently to enable replication (including conditions, number of freeze-thaw cycles)                                                                                                    | 3                    |
|                     | 17   | If performed, predifferentiation described sufficiently to enable replication                                                                                                                                                   | 3,4                  |
| MSC characteristics | 18   | MSC preparation and source described in title and abstract (e.g. BM MSC, ADSC)                                                                                                                                                  | 1,3                  |
|                     | 19   | Cellular composition / heterogeneity                                                                                                                                                                                            | -                    |
|                     | 20   | Immunophenotype and details of in vitro differentiation tested on batch                                                                                                                                                         | 7                    |
|                     | 21   | Passage and percentage viability                                                                                                                                                                                                | 7, Table S1          |
| Delivery            | 22   | MSC delivery described sufficiently to enable replication (including point of delivery, volume of suspension and media used as vehicle)                                                                                         | -                    |
|                     | 23   | If performed, details of codelivered growth factors, scaffolds or carriers                                                                                                                                                      | 2-3                  |
| Post-operative care | 24   | Rehabilitation protocol sufficiently described to enable replication (including immobilisation and physical therapy)                                                                                                            | -                    |
| Outcome             | 25   | Outcome assessments include functional outcomes and recording of complications (including infection and tumour). If performed radiographic outcomes, physical examination findings, return to activities and satisfaction       | -                    |

**Table S3 - MIBO checklist for platelet-rich plasma research. The MIBO Checklist template followed by [55,56]**

| Section / Topic             | Item number | Checklist item                                                                                                                                                                                                                               | Reported on Page No |
|-----------------------------|-------------|----------------------------------------------------------------------------------------------------------------------------------------------------------------------------------------------------------------------------------------------|---------------------|
| Study design                | 1           | Study conducted in accordance with CONSORT (RCT), STROBE (cohort, case-control or cross-sectional) or PRISMA (meta-analysis) guidelines                                                                                                      | -                   |
|                             | 2           | Relevant institutional and ethical approval                                                                                                                                                                                                  | 20                  |
| Recipient details           | 3           | Recipient demographics (including age and gender)                                                                                                                                                                                            | -                   |
|                             | 4           | Comorbidities (including underlying diabetes, blood dyscrasia, inflammatory conditions, pre-existing joint pathology and smoking status)                                                                                                     | -                   |
|                             | 5           | Current anti-inflammatory or anti-platelet medications                                                                                                                                                                                       | -                   |
| Injury details              | 6           | Diagnosis (including relevant grading system and chronicity)                                                                                                                                                                                 | -                   |
|                             | 7           | Results of any pre-operative imaging                                                                                                                                                                                                         | -                   |
|                             | 8           | Previous surgical or biological treatments for current injury                                                                                                                                                                                | -                   |
| Intervention                | 9           | Intervention described sufficiently to enable replication                                                                                                                                                                                    | -                   |
|                             | 10          | Operative findings                                                                                                                                                                                                                           | -                   |
| Wholebloodprocessing        | 11          | Whole blood storage environment (including concentration and volume of anticoagulant, temperature and light exposure)                                                                                                                        | -                   |
| Whole blood characteristics | 12          | Whole blood platelet, differential leukocyte and red cell analysis of all samples                                                                                                                                                            | -                   |
| PRP processing              | 13          | PRP processing described sufficiently to enable replication (including commercial kit details and Spin protocol)                                                                                                                             | -                   |
|                             | 14          | Platelet recovery rate of protocol                                                                                                                                                                                                           | 4,8                 |
|                             | 15          | PRP storage temperature and light exposure                                                                                                                                                                                                   | 4                   |
|                             | 16          | Time between blood drawing, PRP processing, activation and delivery                                                                                                                                                                          | 4                   |
| PRP characteristics         | 17          | PRP format (for example liquid, gel, membrane)                                                                                                                                                                                               | 4                   |
|                             | 18          | PRP platelet, differential leukocyte and red cell analysis of all samples                                                                                                                                                                    | 4,8                 |
| Activation                  | 19          | Activation described sufficiently to enable replication (including volume and concentration of activating agent)                                                                                                                             | -                   |
| Delivery                    | 20          | Point of delivery (intraoperative and/or postoperative or serial)                                                                                                                                                                            | -                   |
|                             | 21          | PRP delivery described sufficiently to enable replication (including volume delivered, concomitant use of stem cells or cytokines, and details of carrier or scaffold)                                                                       | 4,5                 |
| Post-operative care         | 22          | Rehabilitation protocol sufficiently described to enable replication (including immobilization and physical therapy)                                                                                                                         | -                   |
| Outcome                     | 23          | Outcome assessments include functional outcomes and recording of complications (including infection and need for further surgery). If performed radiographic outcomes, physical examination findings, return to activities and satisfaction. | -                   |

Due to the PRP obtained from Indonesian Red Cross Society, the data about demographics, PRP processing, comorbidities, diagnosis, and whole blood analysis were not allowed to be reported.
